# Supplementary material for: A highly luminescent and highly oxygen-sensitive Tb(iii) complex with a tris-aryloxide functionalised 1,4,7-triazacyclononane ligand
Source: Royal Society of Chemistry journal article supplement (doi:10.1039/c4cc07717b), 2014-01-01
Supplement: c4cc07717b1.pdf [file c4cc07717b1.pdf]

## Electronic Supplementary Information (ESI) – Table of Contents

### A highly luminescent and highly oxygen-sensitive Tb(III) complex with a tris-aryloxy functionalised 1,4,7-triazacyclononane ligand

Hidetaka Nakai,<sup>\*ab</sup> Takahiro Goto,<sup>a</sup> Kazuhiro Kitagawa,<sup>ac</sup> Kyoshiro Nonaka,<sup>ac</sup>  
Takahiro Matsumoto<sup>abc</sup> and Seiji Ogo<sup>\*abc</sup>

<sup>a</sup> Department of Chemistry and Biochemistry, Graduate School of Engineering, Kyushu University, 744 Moto-oka, Nishi-ku, Fukuoka 819-0395, Japan

<sup>b</sup> Centre for Small Molecule Energy, Kyushu University, 744 Moto-oka, Nishi-ku, Fukuoka 819-0395, Japan

<sup>c</sup> International Institute for Carbon-Neutral Energy Research (WPI-I2CNER), Kyushu University, 744 Moto-oka, Nishi-ku, Fukuoka 819-0395, Japan

#### Experimental details

|                                                                                                                                                                                           |     |
|-------------------------------------------------------------------------------------------------------------------------------------------------------------------------------------------|-----|
| General .....                                                                                                                                                                             | S 2 |
| X-ray crystallography .....                                                                                                                                                               | S 3 |
| Syntheses of [ $\{(\text{MeMeArO})_3\text{tacn}\}\text{Tb}^{\text{III}}(\text{THF})\}$ ( <b>1</b> ) and [ $\{(\text{MeMeArO})_3\text{tacn}\}\text{Gd}^{\text{III}}(\text{THF})\}$ ] ..... | S 4 |
| References .....                                                                                                                                                                          | S 6 |

#### Tables

|                                                                                                              |     |
|--------------------------------------------------------------------------------------------------------------|-----|
| <b>Table S1</b> Crystallographic data for <b>1</b> .....                                                     | S 7 |
| <b>Table S2</b> Continuous shape measures (CSM) values calculated for the $\text{Tb}^{3+}$ in <b>1</b> ..... | S 8 |

#### Figures

|                                                                                                                                   |     |
|-----------------------------------------------------------------------------------------------------------------------------------|-----|
| <b>Fig. S1</b> UV-vis absorption and corrected luminescence spectra of $\{(\text{MeMeArOH})_3\text{tacn}\}$ ...                   | S 9 |
| <b>Fig. S2</b> Absorption and excitation spectra of <b>1</b> .....                                                                | S10 |
| <b>Fig. S3</b> Luminescence decay curves of <b>1</b> .....                                                                        | S11 |
| <b>Fig. S4</b> Luminescence spectrum of [ $\{(\text{MeMeArO})_3\text{tacn}\}\text{Gd}^{\text{III}}(\text{THF})\}$ ] at 77 K ..... | S12 |
| <b>Fig. S5</b> Luminescence spectrum of <b>1</b> at 77 K .....                                                                    | S13 |
| <b>Fig. S6</b> Electrospray ionisation mass spectrum of <b>1</b> .....                                                            | S14 |

## **Experimental details**

**General:** All experiments were performed under a dry nitrogen or argon atmosphere using standard Schlenk techniques or a glovebox. Tb(OTf)<sub>3</sub> was purchased from Aldrich. Standard gas mixtures containing 0, 30, 50, 75 and 100% of O<sub>2</sub> balanced with N<sub>2</sub> (100, 70, 50, 25 and 0%, respectively) were purchased from Sumitomo Seika Chemicals Co., Ltd.  $\{(\text{MeMeArOH})_3\text{tacn}\} = \{(\text{CH}_2(\text{CH}_3)_2\text{C}_6\text{H}_2\text{OH})_3\text{C}_6\text{H}_{12}\text{N}_3\}$  was prepared according to the literature procedures.<sup>1</sup> All other chemicals were obtained from commercial sources and used as received unless otherwise noted.

UV-vis absorption spectra were measured in a JASCO V-670 UV-visible-NIR Spectrophotometer (cell length = 10.0 mm). Electrospray ionisation mass spectrometry data were obtained by a JEOL JMS-T100ESI AccuTOF LC-plus. Elemental analyses were performed using a Yanaco CHN-coder MT-5.

Luminescence properties (corrected luminescence and excitation spectra, luminescence lifetimes and luminescence quantum yields) were measured using a Horiba Jobin Yvon FluoroMax-4P Spectrofluorometer. Low temperature (77 K) spectra were obtained using a quartz tube cell (1 mm inner diameter) placed in a quartz-walled Dewar flask filled with liquid nitrogen. Luminescence quantum yields were measured by the relative comparison method with quinine bisulfate in 0.5 M H<sub>2</sub>SO<sub>4</sub> ( $\Phi = 0.60$ ) chosen for the standard (The error in the reported values is within  $\pm 10\%$  which is confirmed by the cross-calibration of the standard).<sup>2</sup> The general equation used for determination of relative quantum yields is given as  $Q_x/Q_{st} = [A_{st}(\lambda)/A_x(\lambda)][I_x/I_{st}][n_x^2/n_{st}^2]$ , where  $A$  is absorbance at excitation wavelength,  $I$  is integrated luminescence intensity and  $n$  is the refractive index. The subscripts  $x$  and  $st$  represent sample and standard, respectively.

For measuring oxygen-sensing properties, the standard gas mixtures (0, 30, 50, 75 and 100% of O<sub>2</sub>) and air were passed through the cuvette to equilibrate the oxygen content to the respective concentrations (flow rate = 5 mL min<sup>-1</sup>; time > 5 min). The oxygen concentrations (1.01, 0.75, 0.50, 0.30 and  $0.00 \times 10^{-2}$  M at 100, 75, 50, 30 and 0% of O<sub>2</sub>, respectively) reported in Fig. 3 were calculated from the mole fraction solubility of oxygen in THF at 101.325 kPa partial pressure of gas ( $8.16 \times 10^{-4}$  at 298.15 K).<sup>3</sup>

**X-ray crystallography:** All measurements were made on a Rigaku/MSM Saturn CCD diffractometer with confocal monochromated Mo K $\alpha$  radiation ( $\lambda = 0.71070$  Å). Data were collected and processed using CrystalClear<sup>4</sup> software (Rigaku). The data were corrected for Lorentz and polarisation effects. Empirical absorption corrections were applied. The structures were solved by a direct method: SIR-2011<sup>5</sup> and expanded using a Fourier technique. All calculations were performed using the CrystalStructure<sup>6</sup> crystallographic software package except for refinement, which was performed using SHELXL2013<sup>7</sup>. All non-hydrogen atoms were refined anisotropically. Hydrogen atoms were refined using the riding model. Crystallographic data has been deposited with the Cambridge Crystallographic Data Centre (CCDC). CCDC reference number: 1026622 (**1**).

## Synthesis

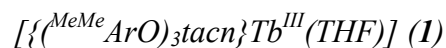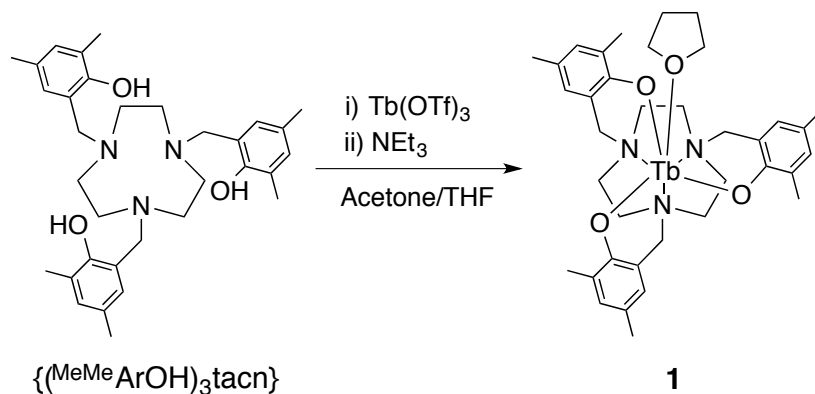

A mixture of  $\{(\text{}^{\text{MeMe}}\text{ArOH})_3\text{tacn}\}$  (300 mg, 0.56 mmol) and  $\text{Tb}(\text{OTf})_3$  (339 mg, 0.56 mmol) in Acetone/THF (100/1, 4 mL) was stirred for 5 min at room temperature. To the mixture was added dropwise triethylamine (0.26 mL, 1.85 mmol). The resulting solution was stirred for 3 h at room temperature. The white precipitate was isolated by filtration and washed with acetone. Yield: 323 mg (77%). Single crystals suitable for X-ray diffraction analysis were obtained from a saturated solution of **1** in AcOEt/THF (9/1) at room temperature.

UV-vis (THF):  $\lambda_{\text{max}}/\text{nm}$  ( $\epsilon/\text{M}^{-1}\text{cm}^{-1}$ ) = 302 (15000). Anal. calcd. for **1** ( $\text{C}_{37}\text{H}_{50}\text{N}_3\text{O}_4\text{Tb}$ ): C, 58.49; H, 6.63; N, 5.53%. Found: C, 58.40; H, 6.60; N, 5.50%.

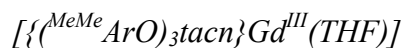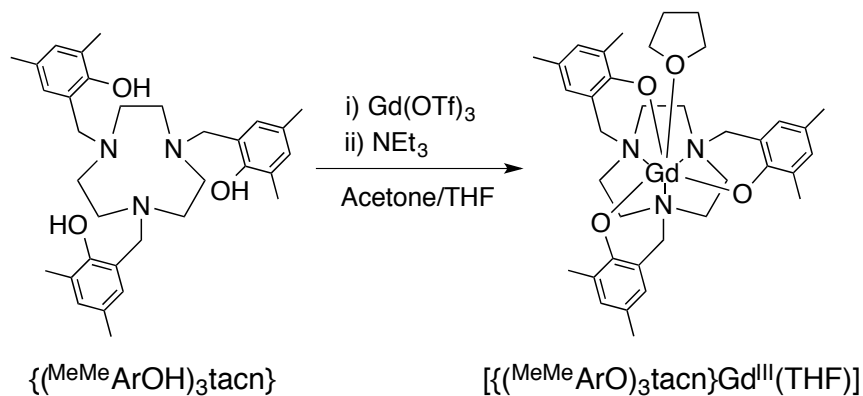

A mixture of  $\{({}^{\text{MeMe}}\text{ArOH})_3\text{tacn}\}$  (54 mg, 0.10 mmol) and  $\text{Gd(OTf)}_3$  (60 mg, 0.10 mmol) in Acetone/THF (100/1, 10 mL) was stirred for 5 min at room temperature. To the mixture was added dropwise triethylamine (0.06 mL, 0.43 mmol). The resulting solution was stirred for 3 h at room temperature. The white precipitate was isolated by filtration and washed with acetone. Yield: 44 mg (70%).

UV-vis (THF):  $\lambda_{\text{max}}/\text{nm}$  ( $\epsilon/\text{M}^{-1}\text{cm}^{-1}$ ) = 303 (15000). Anal. calcd. for  $[\{({}^{\text{MeMe}}\text{ArO})_3\text{tacn}\}\text{Gd}^{\text{III}}(\text{THF})]$  ( $\text{C}_{37}\text{H}_{50}\text{GdN}_3\text{O}_4$ ): C, 58.62; H, 6.65; N, 5.54%. Found: C, 58.62; H, 6.61; N, 5.52%.

## References

- 1 D. A. Moore, P. E. Fanwick and M. J. Welch, *Inorg. Chem.*, 1989, **28**, 1504.
- 2 K. Suzuki, A. Kobayashi, S. Kaneko, K. Takehira, T. Yoshihara, H. Ishida, Y. Shiina, S. Oishi and S. Tobita, *Phys. Chem. Chem. Phys.*, 2009, **11**, 9850.
- 3 R. Battino, T. R. Rettich and T. Tominaga, *J. Phys. Chem. Ref. Data*, 1983, **12**, 163.
- 4 *CrystalClear*: Data collection and Processing Software, Rigaku Corporation (1998-2014). Tokyo 196-8666, Japan.
- 5 M. C. Burla, R. Caliandro, M. Camallli, B. Carrozzini, G. L. Cascarano, C. Giacovazzo, M. Mallamo, A. Mazzone, G. Polidori and R. Spagna, *J. Appl. Cryst.*, 2012, **45**, 357.
- 6 *CrystalStructure 4.1*: Crystal Structure Analysis Package, Rigaku Corporation (2000-2014). Tokyo 196-8666, Japan.
- 7 G. M. Sheldrick, *Acta. Cryst.*, 2008, **A64**, 112.

## Tables

**Table S1** Crystallographic data for **1**

| <b>1</b>                                           |                                                                  |
|----------------------------------------------------|------------------------------------------------------------------|
| Formula                                            | C <sub>37</sub> H <sub>50</sub> N <sub>3</sub> O <sub>4</sub> Tb |
| <i>F</i> <sub>w</sub>                              | 759.75                                                           |
| Crystal system                                     | triclinic                                                        |
| Space group                                        | <i>P</i> -1 (No. 2)                                              |
| <i>a</i> (Å)                                       | 7.901(6)                                                         |
| <i>b</i> (Å)                                       | 14.273(10)                                                       |
| <i>c</i> (Å)                                       | 16.298(10)                                                       |
| $\alpha$ (deg)                                     | 69.07(3)                                                         |
| $\beta$ (deg)                                      | 76.98(4)                                                         |
| $\gamma$ (deg)                                     | 85.52(4)                                                         |
| <i>V</i> (Å <sup>3</sup> )                         | 1673(2)                                                          |
| <i>Z</i>                                           | 2                                                                |
| $\mu$ (cm <sup>-1</sup> )                          | 21.53                                                            |
| <i>F</i> (000)                                     | 780.00                                                           |
| <i>D</i> <sub>calcd</sub> (g/cm <sup>3</sup> )     | 1.508                                                            |
| Temperature (K)                                    | 93                                                               |
| Reflections collected                              | 19591                                                            |
| Independent reflection                             | 7638                                                             |
|                                                    | ( <i>R</i> <sub>int</sub> = 0.048)                               |
| Data/parameters                                    | 7638/406                                                         |
| <i>R</i> <sub>1</sub> [ <i>I</i> > 2σ( <i>I</i> )] | 0.0477                                                           |
| <i>wR</i> <sub>2</sub> (all data)                  | 0.1203                                                           |
| Goodness-of-fit                                    | 1.074                                                            |

**Table S2** Continuous shape measures (CSM) values calculated for the Tb<sup>3+</sup> in **1**

|                            | HP-7                                              | HPY-7  | PBPY-7 | COC-7 | CTPR-7 | JPBPY-7 | JETPY-7 |
|----------------------------|---------------------------------------------------|--------|--------|-------|--------|---------|---------|
| <b>1</b>                   | 36.638                                            | 20.505 | 8.442  | 0.907 | 2.276  | 11.239  | 14.143  |
| HP-7 (D <sub>7h</sub> )    | Heptagon                                          |        |        |       |        |         |         |
| HPY-7 (C <sub>6v</sub> )   | Hexagonal pyramid                                 |        |        |       |        |         |         |
| PBPY-7 (D <sub>5h</sub> )  | Pentagonal bipyramid                              |        |        |       |        |         |         |
| COC-7 (C <sub>3v</sub> )   | Monocapped octahedron (Capped octahedron)         |        |        |       |        |         |         |
| CTPR-7 (C <sub>2v</sub> )  | Monocapped trigonal prism (Capped trigonal prism) |        |        |       |        |         |         |
| JPBPY-7 (D <sub>5h</sub> ) | Johnson pentagonal bipyramid (J13)                |        |        |       |        |         |         |
| JETPY-7 (C <sub>3v</sub> ) | Johnson elongated triangular pyramid (J7)         |        |        |       |        |         |         |

## Figures

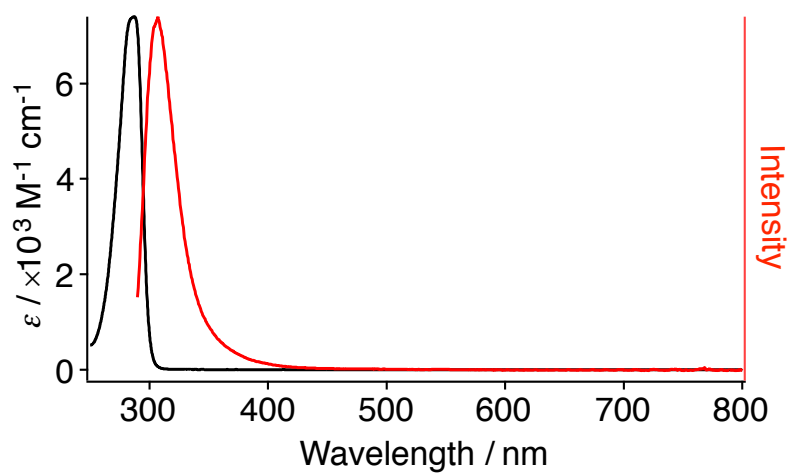

**Fig. S1** UV–vis absorption (black) and corrected luminescence (red,  $\lambda_{\text{ex}} = 270 \text{ nm}$ ) spectra of  $\{(\text{MeMeArOH})_3\text{tacn}\}$  in THF at room temperature.

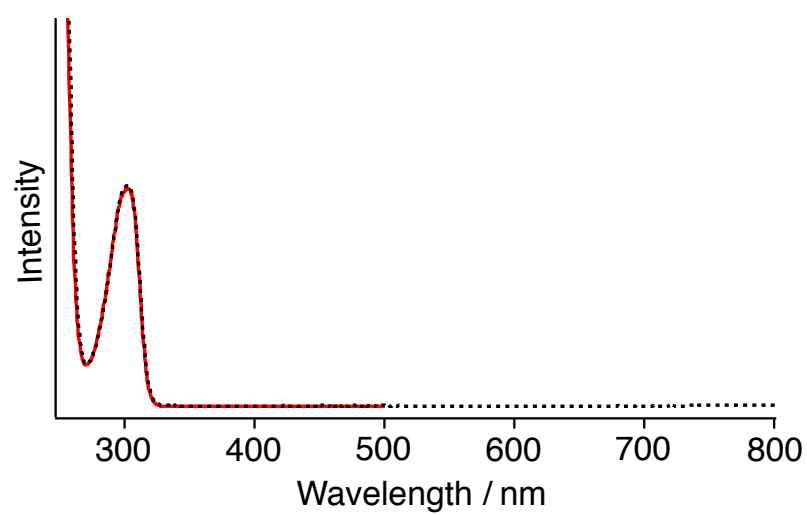

**Fig. S2** Absorption (black dot) and excitation (red) spectra of **1** in THF at room temperature. The excitation spectrum was detected at 547 nm.

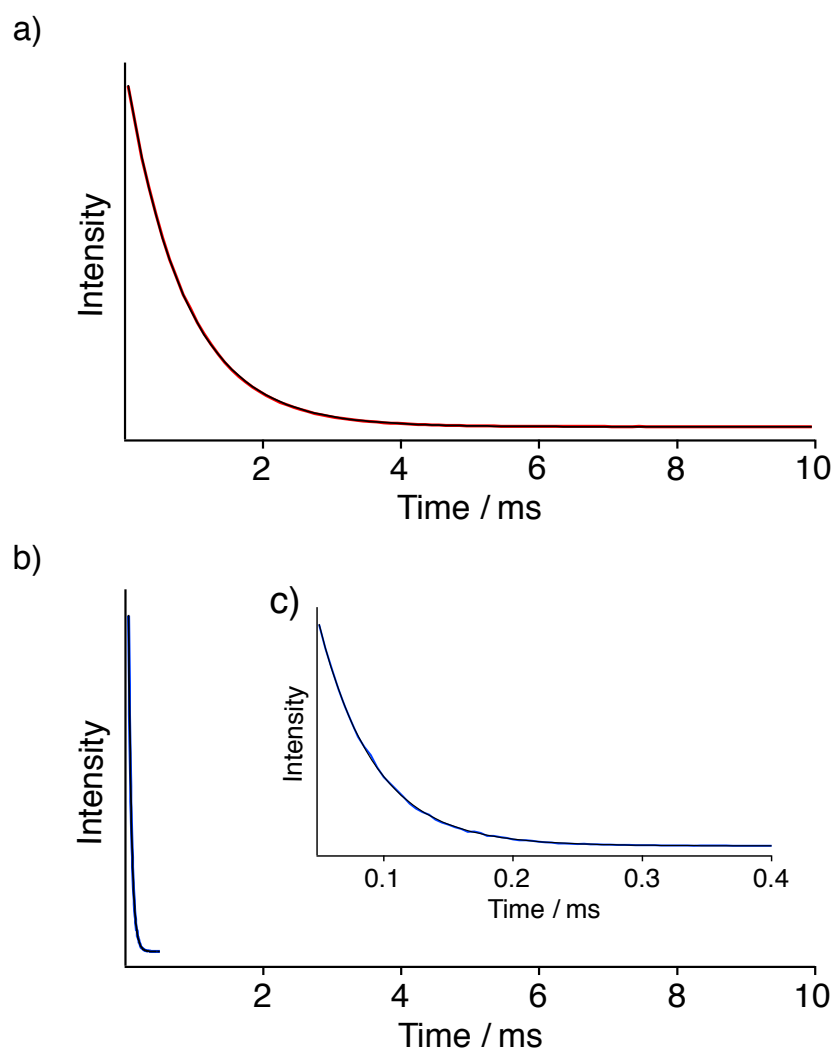

**Fig. S3** Luminescence decay curves of **1** under (a)  $N_2$  (red, 840  $\mu s$ ) and (b and c) air (blue, 40  $\mu s$ ) in THF at room temperature. The decay was monitored at 547 nm ( $\lambda_{ex} = 300$  nm). Fitted by single exponential curve (black).

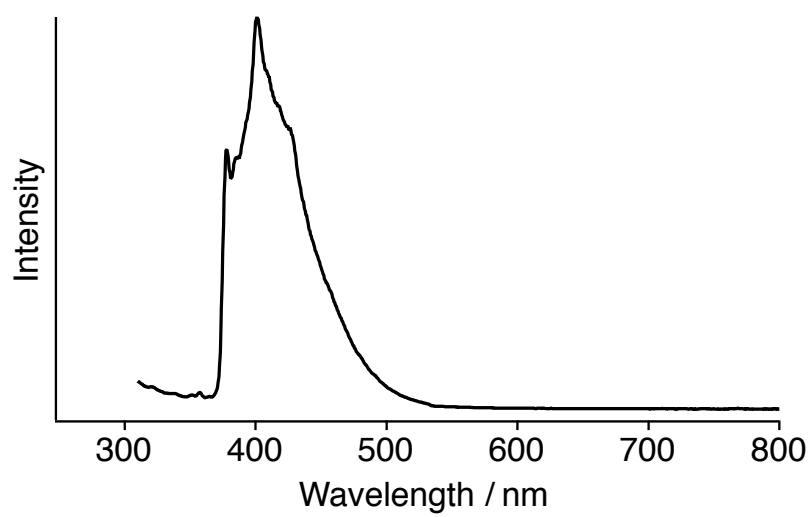

**Fig. S4** Corrected luminescence spectrum of [ $\{({}^{\text{MeMe}}\text{ArO})_3\text{tacn}\}\text{Gd}^{\text{III}}(\text{THF})\}$ ] in 2-MeTHF at 77 K ( $\lambda_{\text{ex}} = 250$  nm).

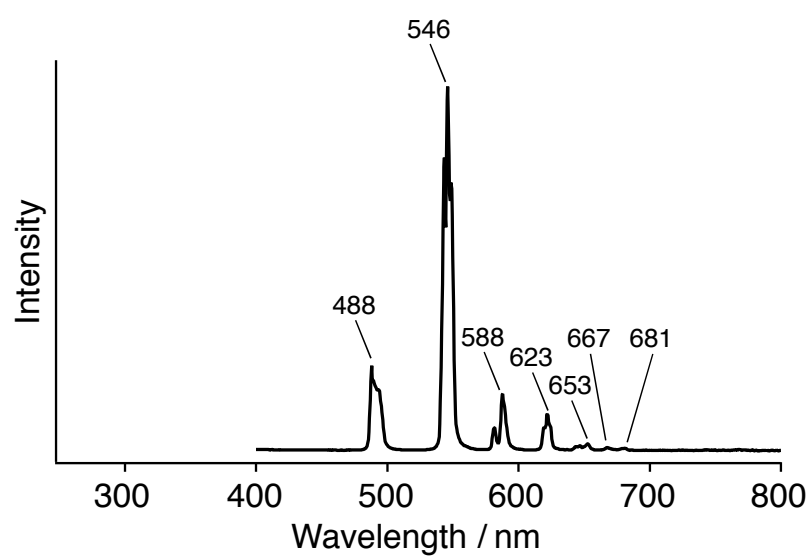

**Fig. S5** Corrected luminescence spectrum of **1** in 2-MeTHF at 77 K ( $\lambda_{\text{ex}} = 300$  nm).

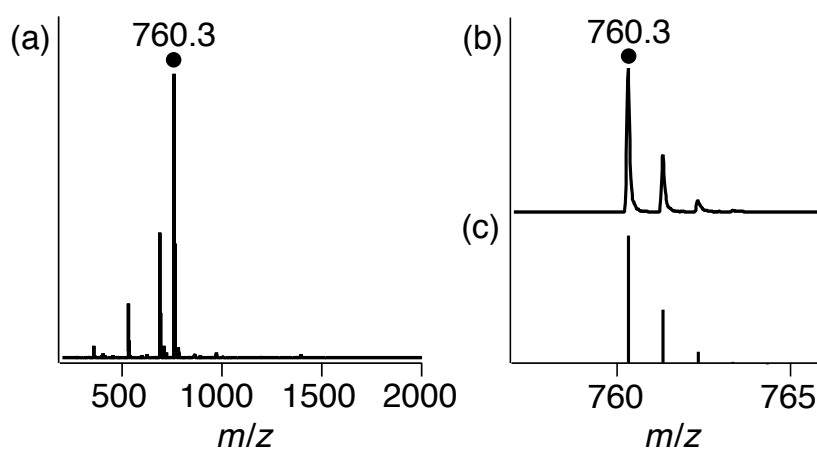

**Fig. S6** (a) Positive-ion electrospray ionisation mass spectrum of **1** dissolved in THF/MeOH (7/1). (b) The signal at  $m/z$  760.3 corresponds to  $[1 + H]^+$ . (c) Calculated isotopic distribution for  $[1 + H]^+$ .
